# Supplementary material for: Using Ensemble and Multi-Model Learning to Predict Longitudinal Hospitalization of Cardiovascular Patients and Warn of Pandemic Risks: A Retrospective Cohort Study with External Validations
Source: Research Square preprint supplement (doi:10.21203/rs.3.rs-6776346/v1), 2025-06-10
Supplement: Supplementary file 1 [file 033473cb4f920bf43876f306.pdf]

## **eMethods**

### **Union Hospital Dataset**

The Union Hospital dataset consists of two main tables: (1) hospitalization records containing patient demographics, admission and discharge dates, and primary diagnoses; and (2) timestamped laboratory test results.

All timestamps were truncated to daily granularity. To facilitate analysis, we transformed the long-format laboratory test table into a wide-format representation. Specifically, for each patient and each day, all laboratory tests were aggregated into a single row, with each test item becoming a separate feature column (e.g., Patient ID, Test Date, Test Item 1, Test Item 2, ...). If a patient did not undergo a particular test on a given day, the corresponding value remained missing. During modeling, these missing values were explicitly encoded as -999 to avoid introducing bias while preserving the missingness pattern.

### **Clinical Timeline Construction and Record Alignment**

We assumed that patients make hospitalization decisions based on their test results and socioeconomic conditions. Therefore, in the behavioral timeline, laboratory tests typically precede hospital admissions. Most patients had multiple tests and multiple admissions. However, a small number of records showed admissions without preceding tests, likely due to transfers or emergency cases. These outliers were removed to maintain consistency with the modeling assumption.

Each test record was aligned to the next available hospital admission, and the time gap (in days) between the test date and the admission date was computed as the target

variable. If no subsequent admission was found, the test record was excluded.

Additionally, we extracted features from the most recent past admission (e.g., length of stay, department, and diagnosis) for each test record by applying a temporal shift. If no historical admissions existed prior to the test, these values were left missing. This alignment ensured that all predictors temporally preceded the admission decision.

### **Local economy (LE) and Local medical resources (LMR) Integration**

We incorporated five socioeconomic indicators from the China City Statistical Yearbook (**Appendix 1**): per capita gross domestic product (GDP), number of hospitals, number of hospital beds, number of licensed physicians, and average annual wage.

Patient addresses were standardized to a "Province-City" format. For patients with multiple addresses, we selected the earliest recorded one. Socioeconomic indicators were matched to each patient using their standardized address and test year. When city-level data was missing, corresponding provincial-level averages were used as substitutes.

### **Laboratory Test Normalization**

Each laboratory test value was normalized based on its clinical reference range. Specifically:

- ☒ Values within the reference range  $[min\_val, max\_val]$  were linearly mapped to the interval  $[0, 1]$ .
- ☒ Values above the upper bound were mapped to values greater than 1, with higher values indicating greater deviation.

- ☒ Values below the lower bound were mapped to values less than 0, with lower values indicating stronger negative deviation.

The full normalization formula is:

$$\text{Normalized Value}(x) = \begin{cases} \frac{x - \min\_val}{\max\_val - \min\_val} & \text{if } \min\_val \leq x \leq \max\_val \\ 1 + \frac{x - \max\_val}{\max\_val - \min\_val} & \text{if } x > \max\_val \\ \frac{x - \min\_val}{\max\_val - \min\_val} & \text{if } x < \min\_val \end{cases}$$

This transformation preserved the semantic direction of abnormality (e.g., hypo- vs. hyper-conditions) while ensuring all lab test features were on a comparable scale, making them suitable for downstream machine learning tasks.

All socioeconomic indicators were standardized using Z-score normalization. The Z-score for a value was computed as:

$$Z = \frac{x - \mu}{\sigma}$$

where  $\mu$  is the mean and  $\sigma$  is the standard deviation of the indicator in the matched population.

Categorical features with standardized vocabularies—such as primary diagnoses, admission departments, and discharge departments recorded in the encounter records—were encoded using categorical encoding. All other continuous features were standardized using Z-score normalization.

**Note:** A complete list of all feature names used in the Union Hospital dataset is provided in **Appendix 2**.

### Same-day Admission Classification Task (Union Hospital)

Due to the large number of laboratory test indicators and the fact that most patients

undergo different sets of tests at each visit, directly including all test indicators as features would result in an extremely sparse feature matrix. Moreover, conventional imputation methods are not suitable in this context, as imputing missing test values could introduce medical bias and distort the modeling process. To address this, we first designed a binary classification task as a feature selection step, aimed at identifying the laboratory tests most relevant to immediate hospitalization decisions. Specifically, we modeled whether a patient would be admitted on the same day as their diagnostic tests, with positive labels assigned to test records that coincided with admission on the same calendar day (i.e., time gap = 0). The model included only demographic variables (e.g., age, sex) and normalized laboratory test features. To isolate the influence of laboratory tests on hospitalization behavior, we deliberately excluded all encounter-level variables (e.g., prior admission history, department information) and socioeconomic indicators (LE and LMR statistics) from this task.

We split the cleaned dataset into 80% training and 20% testing subsets using stratified sampling based on the binary outcome. To handle class imbalance, we applied SMOTE (Synthetic Minority Over-sampling Technique, imbalanced-learn v0.10.1) to the training set. Features with variance below 0.1 were removed using `VarianceThreshold`.

A random forest classifier (`scikit-learn` v1.2.2) was trained with `n_estimators=100` and `random_state=42`. Model performance was evaluated using precision, recall, F1-score, and AUC.

To estimate 95% confidence intervals for the AUC, we used bootstrap resampling

with iterations. For each bootstrap sample, the AUC was computed and sorted, and the confidence interval was given by:

$$CI_{\text{lower}} = \text{Percentile}_{0.025}(AUC^{(1)}, AUC^{(2)}, \dots, AUC^{(1000)})$$

$$CI_{\text{upper}} = \text{Percentile}_{0.975}(AUC^{(1)}, AUC^{(2)}, \dots, AUC^{(1000)})$$

### **Temporal Stratification and Feature Selection Based on SHAP**

We hypothesized that factors influencing patients' hospitalization decisions may vary across different time periods. To explore temporal dynamics, we divided the dataset into 16 non-overlapping half-year intervals based on test dates, covering the time span from March 12, 2012 to March 12, 2020. A separate random forest model was trained on each of these temporal subsets, and performance results are summarized in **eFigure 1**.

SHAP values were computed using the shap package (v0.41.0)<sup>1</sup>, and TreeExplainer was applied to each trained model to compute feature-level attributions for individual samples. The global importance of each feature was defined as the mean absolute SHAP value across all samples:

In the full dataset analysis, we retained only features whose global SHAP importance exceeded 0.01 (see **Appendix 3**). These selected features were subsequently used in downstream regression modeling tasks.

### **Hospital Readmission Regression Task (Union Hospital)**

For the Union Hospital dataset, we also framed a regression task to predict the number of days from a given test to the patient's next hospital admission. We retained only samples with positive labels (i.e., future admissions existed), and excluded those

with large outlier gaps (>1500 days). All continuous features were standardized, and missing values were filled with -999.

We used group-based data splitting, ensuring that all visits from the same patient ID were assigned to either the training or test set, but not both. We then trained a wide range of models:

☒ **Ridge Regression** (scikit-learn v1.2.2)<sup>2</sup>:

standard linear models with L2 regularization applied in the former.

☒ **Support Vector Regression (SVR):**

used RBF kernel, with parameters  $C=1.0$ ,  $\epsilon=0.1$ , and  $\gamma='scale'$ .

☒ **Random Forest Regression:**

ensemble of 100 decision trees with  $\text{max\_depth}=\text{None}$  and  $\text{random\_state}=42$ .

☒ **Gradient Boosting Models:**

- **XGBoost** (xgboost v1.7.6)<sup>3</sup> todo:  $n\_estimators=100$ ,  $\text{max\_depth}=6$ ,  $\text{learning\_rate}=0.1$ ,  $\text{objective}='reg:squarederror'$ .
- **LightGBM** (lightgbm v3.3.2)<sup>4</sup> todo: same settings as XGBoost with  $\text{objective}='regression'$ .
- **HistGradientBoostingRegressor** (scikit-learn v1.2.2) todo:  
 $\text{max\_iter}=100$ ,  $\text{learning\_rate}=0.1$ ,  $\text{l2\_regularization}=1.0$ ,  
 $\text{max\_bins}=255$ .

☒ **Deep Learning Models:**

- All (LSTM, GRU, Transformer-based) were trained with  
 $\text{hidden\_size}=64$ ,  $\text{batch\_size}=32$ ,  $\text{learning\_rate}=0.001$ ,  $\text{num\_layers}=2$ ,

and epochs=100.

- **Transformer Regressor:**

used two encoder layers with 8 attention heads and feedforward dimension 128.

All models received standardized feature inputs, and hyperparameters were selected either from defaults or based on preliminary validation performance.

Evaluation metrics included:

☒ **RMSE** (Root Mean Squared Error)  $= \sqrt{\frac{1}{n} \sum_{i=1}^n (y_i - \hat{y}_i)^2}$

☒ **MAE** (Mean Absolute Error)  $= \frac{1}{n} \sum_{i=1}^n |y_i - \hat{y}_i|$

☒ **R<sup>2</sup>** (Coefficient of Determination)  $1 - \frac{\sum_{i=1}^n (y_i - \hat{y}_i)^2}{\sum_{i=1}^n (y_i - \bar{y})^2}$

☒ **MAE/STD** (MAE-to-Standard-Deviation ratio)  $= \frac{\text{MAE}}{\text{STD}(y)}$

☒ **MASE** (Mean Absolute Scaled Error), comparing each month's error to a naive baseline from the training set:  $= \frac{\text{MAE}}{\text{MAE}_{\text{naive}}}$

☒ **SMAPE (Symmetric Mean Absolute Percentage Error):**

$$\text{SMAPE} = \frac{100\%}{n} \sum_{i=1}^n \frac{|y_i - \hat{y}_i|}{(|y_i| + |\hat{y}_i|)/2}$$

The best model was selected based on the lowest MAE/STD.

### Monthly Evaluation Metrics

To examine the robustness of our hospital readmission regression model over time, we performed a comprehensive **temporal evaluation** using the best-performing regressor (XGBoost). This evaluation was carried out on the Union Hospital dataset, using time-aware metrics and monthly segmentation of the test data.

For each calendar month present in the test set, we computed: RMSE, MAE, R<sup>2</sup>

MAE/STD.

### **Temporal Feature Importance with SHAP**

We computed monthly and sliding-window SHAP values using TreeExplainer from the shap library (v0.41.0). SHAP values were computed on up to 1000 samples per window to ensure tractable computation. For each time window (**eFigure 6**):

- ☒ Mean absolute SHAP values were computed across all features.
- ☒ Fixed and sliding windows were both evaluated:
  - **Fixed windows:** each calendar month was treated as an independent segment.
  - **Sliding windows:** overlapping windows of length 1 month were generated, stepping forward monthly.

### **Special Temporal Analysis**

During monthly evaluations, we observed clear phase-dependent patterns in both feature importance and model performance metrics. We hypothesize that these trends may reflect the impact of major healthcare reforms in China and the COVID-19 pandemic. Therefore, we selected two key timepoints—December 31, 2015, and August 31, 2018—as segmentation points, dividing the timeline into three distinct periods (see **eFigure 7**).

For each time segment sub dataset, we independently trained an XGBoost model. Data preprocessing, model configuration, and evaluation metrics were kept consistent with prior analyses.

### **MIMIC-III Dataset**



## **Data preprocessing**

We accessed the publicly available MIMIC-III database via PhysioNet, following established data use protocols. MIMIC-III includes de-identified health-related data from over 40,000 intensive care unit (ICU) patients. For our study, we extracted structured tables including ADMISSIONS, PATIENTS, LABEVENTS, DIAGNOSES\_ICD, D\_ICD\_DIAGNOSES, D\_LABITEMS, D\_ITEMS, INPUTEVENTS\_CV, INPUTEVENTS\_MV, and OUTPUTEVENTS.

Data preprocessing began with filtering patients who had more than one hospital admission. Admissions were chronologically ordered for each patient, and we computed the number of days between discharge and the next admission as a continuous target variable: TIME\_TO\_NEXT\_ADMISSION. If no subsequent admission was found, we assigned a default value of 9999.

### **365-day readmission classification task**

To conduct the 365-day readmission classification task, we binarized the target variable: patients with  $\text{TIME\_TO\_NEXT\_ADMISSION} \leq 365$  were labeled as 1 (positive), and those with  $\text{TIME\_TO\_NEXT\_ADMISSION} > 365$  or without any subsequent admission were labeled as 0 (negative). We excluded records with missing age and capped age values at 120. The feature matrix included demographics, diagnostic categories, laboratory results, input/output events, and derived statistics such as diagnosis count and prior admission frequency.

We split the dataset using an 80/20 train-test stratified split. To mitigate class imbalance, SMOTE was applied to the training data. Low-variance features (variance

< 0.1), highly missing features (>50% missing), weakly correlated features ( $|r| < 0.01$ ), and highly collinear features (Pearson  $r > 0.95$ ) were removed. We evaluated multiple classifiers for the final prediction task, including:

We evaluated a comprehensive set of classification models using **scikit-learn v1.2.2**, **xgboost v1.7.6**, **lightgbm v3.3.2**, and custom PyTorch-based neural network modules. The hyperparameters were either explicitly set or used their respective default values from the libraries. Details are as follows:

☒ **Logistic Regression** (scikit-learn v1.2.2):

`solver='lbfgs', penalty='l2', C=1.0, max_iter=1000, random_state=42.`

☒ **Decision Tree Classifier** (scikit-learn v1.2.2):

`criterion='gini', max_depth=None, min_samples_split=2, random_state=42.`

☒ **Random Forest Classifier** (scikit-learn v1.2.2):

`n_estimators=100, criterion='gini', max_depth=None, min_samples_split=2, random_state=42, n_jobs=-1.`

☒ **Gradient Boosting Classifier** (scikit-learn v1.2.2):

`n_estimators=100, learning_rate=0.1, loss='log_loss', random_state=42.`

☒ **XGBoost Classifier** (xgboost v1.7.6):

`n_estimators=100, max_depth=6, learning_rate=0.1, objective='binary:logistic', use_label_encoder=False, eval_metric='logloss', random_state=42.`

☒ **LightGBM Classifier** (lightgbm v3.3.2):

`n_estimators=100, learning_rate=0.1, objective='binary', random_state=42.`

☒ **Support Vector Machine (SVC)** (scikit-learn v1.2.2):

kernel='rbf', C=1.0, gamma='scale', random\_state=42.

☒ **Recurrent Neural Network (RNN):**

input\_size set to the number of input features, hidden\_size=64, num\_layers=2,

output\_size = number of classes, trained using batch\_size=32,

learning\_rate=0.001, num\_epochs=200.

☒ **Long Short-Term Memory (LSTM)**<sup>5</sup>:

same settings as RNN.

☒ **Gated Recurrent Unit (GRU):**

same settings as RNN.

☒ **Transformer-based Classifier**<sup>6</sup>:

input\_size, hidden\_size=64, num\_layers=2, output\_size, batch\_size=32,

learning\_rate=0.001, num\_epochs=200. The Transformer encoder used 2

layers, 8 attention heads, and a feedforward dimension of 128.

All deep learning models were trained using standardized features, and categorical variables were encoded prior to model fitting.

All neural models (RNN, LSTM, GRU, Transformer) were implemented with hidden size = 64, number of layers = 2, batch size = 32, learning rate = 0.001, and trained for 200 epochs.

Performance metrics included accuracy, precision, recall, F1-score, and AUC.

The summary of model performance across all classifiers is provided in **eTable 1**

**Shandong Cancer Hospital dataset**

For the Shandong Cancer Hospital dataset, we only had access to hospitalization records, which included demographic details, admission and discharge timestamps, and diagnostic codes. The full list of available features is provided in Appendix 4. Due to the absence of reliable residential address information, we could not incorporate city-level socioeconomic indicators from the China City Statistical Yearbook. However, the hospitalization records contained patients' health insurance categories, which we used as a proxy indicator for socioeconomic status.

We chronologically sorted each patient's hospitalization records to build a temporal sequence of admissions. Initially, we framed a regression task to predict the time gap (in days) between a patient's previous and next hospital admissions using only features from the prior admission. However, because the available features lacked sufficient clinical depth to explain or model the decision to readmit, the regression models showed poor performance and failed to generalize.

As a result, we reframed the task as a **binary classification problem**, aiming to predict whether a patient would be readmitted **within 15 days** after discharge. We adopted a similar modeling pipeline as described for the Union Hospital dataset, including feature preprocessing and temporal alignment.

- **Logistic Regression** (scikit-learn v1.2.2):

`solver='lbfgs', penalty='l2', C=1.0, max_iter=1000, random_state=42`

- **Ridge Classifier** (scikit-learn v1.2.2):

`alpha=1.0, solver='auto', class_weight=None, random_state=42`

- **Support Vector Machine (SVC)** (scikit-learn v1.2.2):

kernel='rbf', C=1.0, probability=True, random\_state=42

- **Random Forest Classifier** (scikit-learn v1.2.2):

n\_estimators=100, max\_depth=None, min\_samples\_leaf=1,

class\_weight='balanced', n\_jobs=-1, random\_state=42

- **Histogram-based Gradient Boosting Classifier**

(HistGradientBoostingClassifier, scikit-learn v1.2.2):

max\_iter=100, learning\_rate=0.1, l2\_regularization=0.0, max\_bins=255,

class\_weight='balanced', random\_state=42

- **XGBoost Classifier** (xgboost v1.7.6):

n\_estimators=100, max\_depth=6, learning\_rate=0.1,

objective='binary:logistic', use\_label\_encoder=False, eval\_metric='logloss',

random\_state=42

- **LightGBM Classifier** (lightgbm v3.3.2):

n\_estimators=100, max\_depth=-1, learning\_rate=0.1,

objective='binary', class\_weight='balanced', boosting\_type='gbdt', verbose=-1,

random\_state=42, n\_jobs=-1

- **LSTM / GRU / Classifiers** (PyTorch):

input\_dim = feature dimension, hidden\_size = 64, num\_layers = 2,

output\_size = 1, learning\_rate=0.001, batch\_size=64, num\_epochs=10,

task='binary'

We also applied both full-dataset and semi-annual temporal splits to evaluate model performance on the readmission prediction task (see **eFigure 2**, **eFigure 3**). In

addition, we computed feature importance scores for each period. This heatmap illustrates the contribution of each feature to the model's output, with importance scores standardized using the standard deviation (STD) score (see **eFigure 4**).

The summary of model performance across all classifiers is provided in **eTable 1** and **Table 2**.

## References:

1. Lundberg SMaL, Su-In. A Unified Approach to Interpreting Model Predictions. In: Garnett IGaUVLaSBaHWaRFaSVaR, editor. *Advances in Neural Information Processing Systems*: Curran Associates, Inc.; 2017.
2. Pedregosa F, Varoquaux G, Gramfort A, et al. Scikit-learn: Machine learning in Python. *the Journal of machine Learning research* 2011; **12**: 2825-30.
3. Chen T, Guestrin C. Xgboost: A scalable tree boosting system. *Proceedings of the 22nd acm sigkdd international conference on knowledge discovery and data mining*; 2016; 2016. p. 785-94.
4. Ke G, Meng Q, Finley T, et al. Lightgbm: A highly efficient gradient boosting decision tree. *Advances in neural information processing systems* 2017; **30**.
5. Hochreiter S, Schmidhuber J. Long short-term memory. *Neural computation* 1997; **9**(8): 1735-80.
6. Vaswani A, Shazeer N, Parmar N, et al. Attention is all you need. *Advances in neural information processing systems* 2017; **30**.

**Appendix 1.** China Urban Statistical Yearbook by the National Bureau of Statistics used in this study. LE and LMR indicators were obtained from the China City Statistical Yearbook, published by the Urban Socioeconomic Survey Department of the National Bureau of Statistics of China.

References website:

<https://olap.epsnet.com.cn/>

**Appendix 2.** Label Data (Post-Mapping Format). 485 Labels Used in Wuhan Union Hospital Data for This Study.

|                                          |                                          |                                               |                                  |                                         |
|------------------------------------------|------------------------------------------|-----------------------------------------------|----------------------------------|-----------------------------------------|
| medical record number                    | IFN- $\gamma$                            | leucine aminopeptidase                        | nucleated red blood cells        | lipoprotein(a)                          |
| inspection time                          | INR                                      | human cytomegalovirus DNA                     | nucleated red blood cells/100WBC | lipoprotein-associated phospholipase A2 |
| Procollagen type 1 N-terminal propeptide | IgE                                      | human growth hormone 120min                   | total nucleated cell count       | cerebrospinal fluid ADA                 |
| 17-KS                                    | Type I collagen N-terminal propeptide    | human growth hormone 30min                    | immature granulocytes            | cerebrospinal fluid AST                 |
| 17-OH                                    | Type I collagen carboxy-terminal peptide | human growth hormone 60min                    | weed pollen mix                  | cerebrospinal fluid CK                  |
| 2019nCov antibody IgG                    | K                                        | human growth hormone 90min                    | Syphilis TRUST                   | cerebrospinal fluid LDH                 |
| 2019nCov antibody IgM                    | K/L ratio                                | human chorionic gonadotropin $\beta$ -subunit | Syphilis specific antibody       | cerebrospinal fluid chloride            |
| 24h urine cortisol                       | K light chain                            | human epididymis protein 4                    | Chlorine                         | cerebrospinal fluid glucose             |
| 24h urine protein                        | L/P                                      | low molecular weight heparin concentration    | Prolactin                        | cerebrospinal fluid protein             |
| 24h urine protein (for calculation)      | LDL                                      | low-density lipoprotein cholesterol           | Serum Amyloid A                  | adenosine deaminase                     |
| 24h urine volume                         | LH Luteinizing Hormone                   | low fluorescence RET                          | Amylase                          | glucose                                 |



|                                         |                                |                                                           |                                                |                                   |
|-----------------------------------------|--------------------------------|-----------------------------------------------------------|------------------------------------------------|-----------------------------------|
| 5'nucleotidase                          | LY30                           | low<br>fluorescence<br>RET%                               | Lymphocyte                                     | shrimp                            |
| AA inhibition<br>rate                   | L light chain                  | thyroid<br>stimulating<br>hormone<br>receptor<br>antibody | Lymphocyte<br>%                                | blood NT-<br>ProBNP               |
| ACTH<br>adrenocorticotr<br>opic hormone | MA                             | immunoglobuli<br>n A                                      | Osmotic<br>pressure                            | blood β-<br>hydroxybutyr<br>ate   |
| ADP inhibition<br>rate                  | MA A                           | immunoglobuli<br>n G                                      | Free prostate<br>specific<br>antigen<br>Cyclic | blood<br>pyruvate                 |
| ANTI-TPO                                | MA ADP                         | immunoglobuli<br>n G4                                     | citrullinated<br>peptide<br>antibody           | blood lactic<br>acid              |
| APTT                                    | MCH                            | immunoglobuli<br>n M<br>intact N-<br>terminal             | Globulin                                       | platelet                          |
| ATIII                                   | MCHC                           | procollagen<br>type I<br>propeptide                       | Triglycerides                                  | platelet<br>(optical<br>method)   |
| ATPO thyroid<br>microsomal<br>antibody  | MCV                            | thrombin-<br>antithrombin<br>complex                      | Parathyroid<br>hormone                         | plateletcrit                      |
| ATPO<br>peroxidase<br>antibody          | NK<br>lymphocytes              | prostate<br>specific<br>antigen                           | Thyroglobuli<br>n                              | mean platelet<br>volume           |
| ATg<br>thyroglobulin<br>antibody        | NK cells<br>(CD3-<br>CD16+56+) | prealbumin                                                | Alpha-<br>fetoprotein                          | platelet<br>distribution<br>width |
| Alpha 1                                 | PCO2(T)                        | animal dander<br>mix                                      | Pathological<br>cast                           | thrombomod<br>ulin                |
| Alpha 2                                 | PGI/PGII ratio                 | mononuclear<br>leukocytes%                                | Pathological<br>cast<br>(sediment)             | blood<br>ammonia                  |
| Andro<br>Androstenedio<br>ne            | PO2(T)                         | monocytes                                                 | Carcinoembr<br>yonic antigen                   | blood<br>amylase                  |
| Angle                                   | PRL Pituitary<br>Prolactin     | monocytes%                                                | Albumin/Glo<br>bulin Ratio                     | serum<br>retinol-                 |

|                            |                            |                               |                              |                                         |
|----------------------------|----------------------------|-------------------------------|------------------------------|-----------------------------------------|
|                            |                            |                               |                              | binding protein                         |
| Angle (Quick Method)       | PT                         | follicle stimulating hormone  | White blood cell             | serum transferrin                       |
| Beta                       | PTA                        | soluble transferrin receptor  | Interleukin-10               | blood glucose                           |
| BuBc                       | PTH Parathyroid Hormone    | folic acid                    | Interleukin-2                | hemoglobin                              |
| B-type natriuretic peptide | Prog Progesterone          | homocysteine                  | Interleukin-4                | blood lipase                            |
| B lymphocyte               | R                          | basophils                     | Interleukin-6                | complement C3                           |
| B lymphocyte (CD3-CD19+)   | R(Heparin)                 | basophils%                    | Total white blood cell count | complement C4                           |
| C8000HDL                   | RET_He                     | eosinophils                   | Cortisol                     | gamma-glutamyl transpeptidase           |
| CD3+ total T lymphocyte    | SCT Confirmation           | eosinophils%                  | Cortisol 0 o'clock           | high-sensitivity C-reactive protein     |
| CD4+ T lymphocyte          | SCT Confirmation Ratio     | Remarks                       | Cortisol AM 12 o'clock       | high-sensitivity troponin I             |
| CD4/CD8 ratio              | SCT Screening              | Remarks 2                     | Cortisol AM 4 o'clock        | transferrin                             |
| CD8+ T lymphocyte          | SCT Screening/Confirmation | polymorphonuclear leukocytes% | Cortisol AM 8 o'clock        | apolipoprotein AI                       |
| CK-MB activity measurement | SCT Screening Ratio        | stool microscopy              | Cortisol PM 4 o'clock        | apolipoprotein B                        |
| CK-MB mass measurement     | TEG-ACT                    | large platelet ratio          | Direct bilirubin             | helper/inducer T lymphocytes (CD3+CD4+) |

|                                           |                                         |                                           |                                   |                                      |
|-------------------------------------------|-----------------------------------------|-------------------------------------------|-----------------------------------|--------------------------------------|
| CMV-DNA<br>(whole<br>blood/intracellular) | TG<br>Thyroglobulin                     | aspartate<br>aminotransferase             | Testosterone                      | hyaline cast<br>(sediment)           |
| CMV-DNA-<br>intracellular                 | TNF- $\alpha$                           | progesterone                              | Alkaline<br>phosphatase           | calcium                              |
| CSF-IgA                                   | TNI                                     | small dense<br>low-density<br>lipoprotein | Phosphorus                        | sodium                               |
| CSF-IgG                                   | TRAb Anti-<br>TSHR                      | urine PH                                  | Neuron-<br>specific<br>enolase    | potassium                            |
| CSF-IgM                                   | TSH                                     | urine $\alpha$ 1-<br>microglobulin        | Fasting blood<br>glucose          | ferritin                             |
| C-peptide                                 | TSH Thyroid<br>Stimulating<br>Hormone   | urine $\beta$ 2<br>microglobulin          | Rheumatoid<br>factor              | ceruloplasmin                        |
| C-peptide<br>0min                         | TT                                      | urine epithelial<br>cells                 | Rheumatoid<br>factor IgA          | ceruloplasmin assay                  |
| C-peptide<br>10min                        | Testo<br>Testosterone                   | urine epithelial<br>cells<br>quantitative | Rheumatoid<br>factor IgG          | magnesium                            |
| C-peptide<br>120min                       | T lymphocytes<br>(CD3+)                 | urine<br>immunoglobulin G                 | Rheumatoid<br>factor IgM          | anion gap                            |
| C-peptide<br>150min                       | VCA-IgA<br>Ratio:                       | urine specific<br>gravity                 | Dust mite                         | procalcitonin                        |
| C-peptide<br>180min                       | VMA                                     | urine chloride                            | Glycated<br>serum protein         | random urine<br>creatinine           |
| C-peptide<br>240min                       | ZnT8A Zinc<br>Transporter 8<br>Antibody | urine amylase                             | Glycated<br>hemoglobin            | random blood<br>glucose              |
| C-peptide<br>2min                         | cCa <sup>++</sup>                       | urine<br>leukocytes                       | Carbohydrate<br>antigen 72-4      | occult blood<br>(chemical<br>method) |
| C-peptide<br>300min                       | cCl-                                    | urine<br>leukocytes<br>quantitative       | Carbohydrate<br>antigen<br>CA125  | estradiol                            |
| C-peptide<br>30min                        | cH                                      | urine cortisol                            | Carbohydrate<br>antigen<br>CA15-3 | fungal mix                           |
| C-peptide<br>360min                       | cH(T)                                   | urine iodine<br>concentration             | Carbohydrate<br>antigen<br>CA153  | unconjugated<br>bilirubin            |

|                                |                                |                                          |                                                                           |                                                       |
|--------------------------------|--------------------------------|------------------------------------------|---------------------------------------------------------------------------|-------------------------------------------------------|
| C-peptide<br>4min              | cHCO3(P)                       | urine<br>phosphorus                      | Carbohydrate<br>antigen<br>CA19-9                                         | non-high-<br>density<br>lipoprotein<br>cholesterol    |
| C-peptide<br>60min             | cHCO3(Pst)                     | urine cast<br>quantitative               | Carbohydrate<br>antigen<br>CA199                                          | 1-hour<br>postprandial<br>blood glucose               |
| C-peptide<br>6min              | cK+                            | urea                                     | Red blood<br>cell                                                         | 2-hour<br>postprandial<br>blood glucose               |
| C-peptide<br>8min              | cLac                           | blood urea<br>nitrogen                   | Red blood<br>cell<br>distribution<br>width<br>coefficient of<br>variation | 3-hour<br>postprandial<br>blood glucose               |
| C-peptide<br>90min             | cNa+                           | urine red blood<br>cells                 | Red blood<br>cell<br>distribution<br>width                                | 0.5-hour<br>postprandial<br>blood glucose             |
| D-dimer                        | ctCO2(B)                       | urine red blood<br>cells<br>quantitative | Red blood<br>cell<br>distribution<br>width<br>standard<br>deviation       | osteocalcin<br>N-terminal<br>mid-molecule<br>fragment |
| DHEA<br>Dehydroepiandrosterone | ctHb                           | urine vitamin<br>C                       | Hematocrit                                                                | osteocalcin<br>N-terminal<br>fragment                 |
| Delta bilirubin                | ctO2                           | urine<br>creatinine                      | Erythrocyte<br>sedimentation<br>rate                                      | osteocalcin<br>Oc                                     |
| E2 Estradiol                   | dRVVT<br>Confirmation          | urine<br>urobilinogen                    | Tissue<br>plasminogen<br>activator-<br>inhibitor 1<br>complex             | high-density<br>lipoprotein<br>cholesterol            |
| EA-IgA ratio:                  | dRVVT<br>Confirmation<br>Ratio | urine retinol-<br>binding protein        | Total cell<br>count                                                       | high<br>fluorescence<br>RET                           |
| EB-DNA-<br>intracellular       | dRVVT<br>Screening             | urine<br>transferrin                     | Cytokeratin<br>19 fragment                                                | high<br>fluorescence<br>RET%                          |

|                                     |                                 |                           |                                 |                                                       |
|-------------------------------------|---------------------------------|---------------------------|---------------------------------|-------------------------------------------------------|
| EB-DNA-extracellular                | dRVVT<br>Screening/Confirmation | urine calcium             | Conjugated bilirubin            | squamous cell carcinoma related antigen               |
| EBV-DNA (whole blood/intracellular) | dRVVT<br>Screening Ratio        | urine sodium              | Vitamin B12                     | bmi                                                   |
| EBV-DNA                             | eGFR                            | urine potassium           | Reticulocyte                    | systolic pressure                                     |
| EBV early antigen antibody IgA      | hGH Human Growth Hormone        | urine magnesium           | Reticulocyte %                  | diastolic pressure                                    |
| EBV early antigen antibody IgG      | p50(st)                         | bunya virus RNA           | Myoglobin                       | heart rate                                            |
| EBV nuclear antigen-IgG             | pCO2                            | immature RET ratio        | Creatinine                      | body temperature                                      |
| EBV viral capsid antigen IgA        | pH                              | immature RET ratio%       | Creatinine (picric acid method) | respiration                                           |
| EBV viral capsid antigen IgG        | pH(T)                           | microalbumin              | Creatinine (enzymatic method)   | GDP per capita (yuan)                                 |
| EBV viral capsid antigen IgM        | pH(st)                          | German cockroach          | Creatine kinase                 | number of hospitals and health centers (units)        |
| EPL                                 | pO2                             | cardiolipin antibody IgA  | Gastrin-17                      | number of beds in hospitals and health centers (beds) |
| FDP                                 | pO2(A-a)                        | cardiolipin antibody IgG  | Cholinesterase                  | number of doctors (people)                            |
| FIB                                 | sO2                             | cardiolipin antibody IgM  | Insulin                         | average wage of employees (yuan)                      |
| FS51HDL                             | B2 Glycoprotein 1 IgA           | total 25-hydroxyvitamin D | Insulin 0min                    | gender                                                |

|                                              |                                         |                                               |                |                           |
|----------------------------------------------|-----------------------------------------|-----------------------------------------------|----------------|---------------------------|
| FSH Follicle-stimulating hormone             | B2 Glycoprotein 1 IgG                   | total IgE                                     | Insulin 10min  | date of birth             |
| FT3                                          | B2 Glycoprotein 1 IgM                   | total PINP                                    | Insulin 120min | age                       |
| FT3 Free triiodothyronine                    | $\alpha$ -Hydroxybutyrate Dehydrogenase | total carbon dioxide                          | Insulin 150min | admission department      |
| FT4                                          | $\alpha$ 1-Antitrypsin                  | total cholesterol                             | Insulin 180min | discharge department      |
| FT4 Free thyroxine                           | $\beta$ -HCG                            | total bile acid                               | Insulin 240min | main diagnosis            |
| G                                            | $\beta$ 2-Microglobulin                 | total bilirubin                               | Insulin 2min   | admission time            |
| GADA<br>Glutamic acid decarboxylase antibody | $\beta$ CrossLap                        | total protein                                 | Insulin 300min | discharge time            |
| GADA                                         |                                         |                                               |                |                           |
| Gamma                                        | $\gamma$ -Glutamyl Transferase          | house dust mite                               | Insulin 30min  | last diagnosis            |
| HCV Ab                                       | Alanine Aminotransferase                | suppressor/cytotoxic T lymphocytes (CD3+CD8+) | Insulin 360min | last admission department |
| HCV-Ab                                       | Neutrophils                             | anti-MPO antibody                             | Insulin 4min   | last admission time       |
| HCV-RNA-intracellular                        | Neutrophils %                           | anti-RA33 antibody                            | Insulin 60min  | last discharge time       |
| HCV-RNA-extracellular                        | Medium Fluorescence RET                 | anti-hepatitis C virus antibody               | Insulin 6min   | time difference           |
| HCV-RNA quantitative                         | Medium Fluorescence RET%                | spot count of antigen A                       | Insulin 8min   | last hospitalization days |
| HCV-RNA quantitative-intracellular           | Hepatitis B e Antibody                  | spot count of antigen B                       | Insulin 90min  | fee type                  |

|                                           |                                    |                                                     |                                       |                                               |
|-------------------------------------------|------------------------------------|-----------------------------------------------------|---------------------------------------|-----------------------------------------------|
| HCV-RNA<br>quantitative-<br>extracellular | Hepatitis B e<br>Antigen           | anticardiolipin<br>antibody                         | Insulin-like<br>growth factor<br>1    | last main<br>surgical<br>operation<br>name    |
| HDL+LDL                                   | Hepatitis B<br>Core Antibody       | anti-cyclic<br>citrullinated<br>peptide<br>antibody | Insulin-like<br>growth factor<br>1-CT | last discharge<br>main<br>diagnosis<br>name 1 |
| HIV-Ab                                    | Hepatitis B<br>Surface<br>Antibody | anti-thyroid<br>peroxidase<br>antibody              | Cystatin C                            | last<br>pathological<br>diagnosis             |
| Hct                                       | Hepatitis B<br>Surface<br>Antigen  | anti-proteinase<br>3 antibody                       | collagen<br>degradation<br>product    | hospitalizatio<br>n times                     |
| IA-2A tyrosine<br>phosphatase<br>antibody | lactic<br>dehydrogenase            | Anti-<br>Streptolysin O                             | fat globule                           | last<br>hospitalizatio<br>n duration          |

### Appendix 3. Selected Feature on Regression of Time to Next Admission Task

|                                                         |                                         |                                            |
|---------------------------------------------------------|-----------------------------------------|--------------------------------------------|
| medical record number                                   | Direct bilirubin                        | bmi                                        |
| body temperature                                        | high-density lipoprotein<br>cholesterol | potassium                                  |
| respiration                                             | PT                                      | Glycated hemoglobin                        |
| heart rate                                              | White blood cell                        | Fasting blood glucose                      |
| systolic pressure                                       | mean platelet volume                    | Osmotic pressure                           |
| Red blood cell distribution<br>width standard deviation | Neutrophils                             | Alanine<br>Aminotransferase                |
| large platelet ratio                                    | urine specific gravity                  | basophils%                                 |
| monocytes                                               | INR                                     | sodium                                     |
| leucine aminopeptidase                                  | 5'nucleotidase                          | magnesium                                  |
| diastolic pressure                                      | MCH                                     | low-density lipoprotein<br>cholesterol     |
| Lymphocyte%                                             | MCV                                     | apolipoprotein AI                          |
| Neutrophils %                                           | Phosphorus                              | $\alpha$ -Hydroxybutyrate<br>Dehydrogenase |
| Creatinine (enzymatic<br>method)                        | eosinophils                             | Alpha-fetoprotein                          |
| gamma-glutamyl<br>transpeptidase                        | FT4                                     | TSH                                        |
| platelet distribution width                             | apolipoprotein B                        | FT3                                        |
| eosinophils%                                            | urine uric acid                         | Albumin/Globulin<br>Ratio                  |
| monocytes%                                              | total bilirubin                         | high-sensitivity C-<br>reactive protein    |
| small dense low-density<br>lipoprotein                  | plateletcrit                            | lipoprotein(a)                             |
| hemoglobin                                              | Chlorine                                | unconjugated bilirubin                     |
| Creatinine                                              | total protein                           | urine PH                                   |
| APTT                                                    | Creatine kinase                         | ferritin                                   |
| prealbumin                                              | calcium                                 | cLac                                       |
| age                                                     | FIB                                     | urea                                       |
| lactic dehydrogenase                                    | Alkaline phosphatase                    | ATIII                                      |
| Red blood cell                                          | blood urea nitrogen                     | Amylase                                    |
| Lymphocyte                                              | Cystatin C                              | ctO2                                       |
| platelet                                                | $\gamma$ -Glutamyl Transferase          | pCO2                                       |
| total bile acid                                         | aspartate aminotransferase              | Hct                                        |
| Hematocrit                                              | Albumin                                 | cK+                                        |
| MCHC                                                    | anion gap                               | complement C3                              |
| TT                                                      | total carbon dioxide                    | pO2                                        |
| glucose                                                 | Globulin                                | cCl-                                       |



**Appendix 4.** Label Data (Post-Mapping Format). 27 Labels Used in Shandong Cancer Hospital Data for This Study.

|                                   |                                         |                                             |
|-----------------------------------|-----------------------------------------|---------------------------------------------|
| Medical Record Number             | Primary Discharge Diagnosis             | Other Social Insurance                      |
| Number of Hospitalizations        | Pathological Diagnosis                  | Fully Public Funded                         |
| Payment Type                      | Primary Procedure Name                  | Poverty Assistance                          |
| Gender                            | Urban Employee Medical Insurance        | Basic Medical Insurance for Urban Employees |
| Age                               | New Rural Cooperative Medical Insurance | Basic Medical Insurance for Urban Residents |
| Admission Date                    | Commercial Health Insurance             | New Rural Cooperative Medical Scheme        |
| Discharge Date                    | Urban Resident Medical Insurance        | Medical Restriction                         |
| Discharge Department (Front Page) | Fully Self-Paid                         | Commercial Medical Insurance                |
| Length of Stay (Days)             | Other                                   | Referred from Other Institutions            |
